1 **Frequency but not phase specific modulation of binocular rivalry with transcranial alternating**  
2 **current stimulation**

3  
4  
5  
6

7 Jorge Delgado<sup>1</sup>, Guillaume Riesen<sup>2</sup>, Vladimir Y. Vildavski<sup>3</sup> and Anthony M. Norcia<sup>3</sup>

8  
9

10 <sup>1</sup> Biology Undergraduate Program, Stanford University

11 <sup>2</sup> Neurosciences Graduate Program, Stanford University

12 <sup>3</sup> Department of Psychology, Stanford University

13  
14  
15  
16  
17  
18  
19  
20  
21  
22  
23

24 **Keywords:** Transcranial Electrical Stimulation, Transcranial Alternating Current Stimulation,  
25 visual perception, binocular rivalry

26

27 **Acknowledgements:** Supported by 1R21EY026748 from the National Eye Institute, National  
28 Institutes of Health, Stanford Bio-X Summer Undergraduate Research Program.

29

30 **ABSTRACT**

31           Recent transcranial alternating current stimulation (tACS) literature suggests  
32 that tACS effects can in principle be both frequency and phase specific. In a series of three  
33 experiments using 69 participants used binocular rivalry percepts as a read-out for the effects  
34 of phase-synchronized tACS stimulation. To test for phase specificity, with frequency the same  
35 in each eye, we visually stimulated each eye with 3Hz, with stimuli in each eye presented in  
36 temporal in antiphase. The frequency-specific paradigm visually stimulated the right eye with  
37 3Hz, and the left eye with 5Hz. Each experiment was accompanied by 3Hz tACS, whose phase  
38 with respect to the visual stimulus was varied by 0°, 90°, 180°, or 270° in relation to the right  
39 eye's stimulus. A baseline no-tACS block preceded the stimulation blocks and two more  
40 followed, immediately and ten minutes after. Individual blocks lasted 4 minutes. Additionally, a  
41 no-tACS control experiment identical to the 3 Hz anti-phase visual stimuli setup was conducted,  
42 keeping all parameters the same but eliminating tACS. During stimulation, the 3 Hz anti-phase  
43 visual stimuli setup slowed the rate of rivalry in both eyes. Conversely, the 3Hz-right, 5Hz-left  
44 setup slowed the right (targeted) eye significantly while leaving the left (unstimulated) eye  
45 unchanged. In both experiments, durations returned to baseline after 10 minutes. Our results  
46 are consistent with the frequency-specific model of tACS, and with the Leveltian hypothesis  
47 that stimulation weakens the stimulated eye, as the right eye got weaker when it was directly  
48 targeted, and both eyes got weaker when targeted in antiphase. tACS does not appear  
49 to preferentially modulating percept durations in one phase more than in another.

50  
51  
52  
53  
54  
55  
56  
57  
58  
59  
60  
61  
62  
63

## 64 INTRODUCTION

65

66 Neural activity can be modulated by electric fields generated by electrodes placed on  
67 the scalp – a technique referred to as transcranial electrical stimulation (tES). Three commonly  
68 used tES methods differ in the temporal profile of the applied current, *e.g.* direct current  
69 (transcranial direct current stimulation; tDCS), alternating current (transcranial  
70 alternating current stimulation; tACS), or random noise currents (transcranial random noise  
71 stimulation; tRNS). In comparison to TDCS or TRNS, tACS is a particularly effective method to  
72 address possible modes of action as it can be delivered at frequencies that are designed to  
73 interact both with natural brain-wave rhythms (Antal and Paulus, 2013; Helfrich et al., 2014) as  
74 well as responses to externally applied periodic sensory stimuli (Neuling et al., 2012).

75 Prior work on the mechanism of action of tACS has used invasive recordings in animal  
76 models and has suggested several mechanisms by which the imposed tACS field could affect  
77 with ongoing neural activity, either instantaneously (Liu et al., 2018) or as a (partially) sustained  
78 after-effect (Stagg et al., 2018). One of the proposed instantaneous mechanisms is stochastic  
79 resonance, in which cells whose membrane potential is near firing threshold can be induced to  
80 fire by the addition of an external field (Ozen et al., 2010). Related to stochastic resonance, the  
81 “rhythm resonance” mechanism involves precisely timed fields that are coordinated with the  
82 depolarizing phase of neurons whose membrane potential is spontaneously fluctuating in an  
83 oscillating fashion (Deans et al., 2007; Frohlich and McCormick, 2010; Reato et al., 2010, 2013).  
84 That is, tACS may act by summation with the membrane potential of active neurons such that  
85 when tACS is in-phase with the ongoing or membrane potential fluctuations, spiking rates  
86 increase. External fields may combine with internal fields in such a way to cluster spiking,  
87 without actually increasing or decreasing the overall firing rate (Liu et al., 2018). Finally,  
88 external fields of high strength can entrain local networks by overwhelming the ongoing activity  
89 (Liu et al., 2018). Proposed non-instantaneous mechanisms include various forms of synaptic  
90 plasticity that effect synaptic efficacy (Stagg and Nitsche, 2011; Stagg et al., 2018).

91 Of present interest, tACS has been paired with periodic sensory stimulation that is  
92 expected to drive cortex at a specific frequency and its harmonics. This approach has the

93 potential to provide strong evidence for instantaneous or “on-line” effects, as well as non-  
94 instantaneous (“off-line”) effects. An example of the former is the finding that hearing  
95 threshold for periodic tone bursts can be modulated by frequency-matched tACS in a phase-  
96 dependent fashion (Neuling et al., 2012).

97 Here we used tACS and periodic visual stimulation to measure online and offline effect  
98 of tACS on visual perception, using the phenomenon of binocular rivalry as a perceptual read-  
99 out. Binocular rivalry occurs when images presented to each eye are not fusible into a single  
100 percept. Instead of seeing a single image, as in normal viewing, perception alternates between  
101 the images presented to each eye. We reasoned that if tACS modulates neural activity in a  
102 frequency or phase-specific fashion, it could alter the balance of perceptual salience for images  
103 presented to each eye and this alteration may be reflected in the statistics of the perceptual  
104 alternations. Importantly for present purposes, the dynamics of the perceptual alternation  
105 depend on the relative perceptual strength of the two images and these dynamics have been  
106 formalized into a set of laws which can be used as an interpretive framework (LeVeldt, 1965;  
107 Brascamp et al., 2015). We test both the phase and frequency specific models of tACS, looking  
108 to see if tACS might have constructive or destructive effects when presented in phase or out of  
109 phase with visual stimulation of the same frequency, or if merely being frequency matched is all  
110 that is required of tACS for it to have an effect, either online or offline.

111

## 112 **METHODS**

113

### 114 **Participants**

115 Participants in this study were 34 females and 35 males from Stanford and the  
116 surrounding community who received either credit in a psychology course or monetary  
117 payment of \$30. Participants were screened to have a stereo acuity better than 50 arc-seconds  
118 on the RanDot stereo-acuity test, averaging 31.28 arc-seconds. Participants had an average  
119 right eye visual acuity of -0.068 and an average left eye visual acuity of -0.061 on the Bailey-  
120 Lovie chart. Eye dominance was measured with the hole in the card test and revealed that 19  
121 participants were left eye dominant and 50 were right eye dominant. Procedures were

122 approved by the Stanford Institutional Review Board and each participant provided written  
123 informed consent.

124

## 125 **Visual Stimulation**

126 For each of three experiments, 10% Michelson contrast, dichoptic Gabor patches (3  
127 c/deg, sigma 1 deg) were presented to the participants. The Gabor patches were oriented at  
128 135 degrees in the left eye and 45 degrees in the right eye. The patches flashed either at 3Hz or  
129 5Hz, depending on the experiment. The stimulus was generated using in-house software and  
130 presented on a 55-inch, LG passive 3D OLED screen at a mean luminance of 10cd/m<sup>2</sup>. The  
131 Gabor patches were viewed by participants from 80cm from the stimulus display. Three  
132 concentric circles, visible to both eyes acting as a fusion and focus lock surrounded the test  
133 stimulus. Participants wore polarizing-filter glasses and placed their head on a head-rest that  
134 had been pre-measured to be 80cm from the stimulus display. The experiments were  
135 performed in a darkened room and participants signaled their rivalry percepts by via button  
136 presses. They were instructed to press the left button if the bars on the screen appeared to be  
137 oriented up and to the left, and the right button if the bars on the screen appeared to be  
138 oriented up and to the right. They were instructed to press neither button in the case of mixed  
139 percepts. They were also given a practice period and the opportunity to ask for any  
140 clarification.

141 In the first two experiments described below, the stimulus flashed at 3Hz in each eye,  
142 with left eye stimulus being shifted in phase by 180 degrees relative to the right eye. In the  
143 third experiment, the left eye visual stimulus was presented at 5Hz and the right eye stimulus  
144 was presented at 3Hz. Electrical stimulation, when present was delivered at 3 Hz.

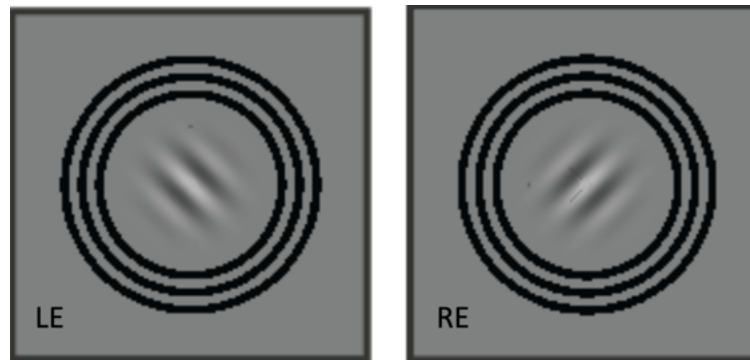

**Figure 1:** Visual stimulus schematic. The two Gabor patches with orthogonal carrier orientations were overlaid on one another on the 3D screen. The left eye saw the image on the left, while the right eye only saw the image on the right.

145

#### 146 **tACS Stimulation**

147 Sinusoidal electrical stimulation was delivered via a StarStim system (NeuroElectrics,  
148 Barcelona). For every participant, the protocol before starting stimulation involved: hair-  
149 washing with baby shampoo, electrode cap sizing, abrasive skin preparation via Lectron II gel  
150 application to clean the targeted scalp regions, electrode placement, and electrode gel  
151 application. Impedances were kept below 10k. The two source electrodes were placed at P07  
152 and P08, while the common sink electrode was placed at Oz. Stimulation current amplitudes  
153 were 1 mA at each of the source electrodes and 2 mA at the sink electrode. This “tri-polar”  
154 montage was designed to minimize current flow through the eyes and thus to minimize the  
155 chance of inducing phosphenes (Kar and Krekelberg, 2012) and to focus the stimulation on the  
156 central field (~2 deg) representations in V1, V2 and V3 that are located on the occipital  
157 pole (Dougherty et al., 2003). Current distributions were visualized with StarStim BEM modeling  
158 software.

159 The StarStim system was controlled over Bluetooth. Because the start time of the  
160 electrical stimulation upon initiating a request for stimulation over Bluetooth was not  
161 deterministic, the computer generating the visual stimulus monitored the phase of  
162 the tACS stimulation in real time by recording the differential signal between electrodes  
163 at Oz and P08. The visual-stimulation software monitored the tACS waveform in real time and  
164 scheduled the start of visual-stimulation so it began at each of 4 pre-determined phase offsets

165 of 0, 90, 180 or 270 degrees relative to the tACS stimulus. This allowed the system to match  
166 the current and visual stimulus phase relationships with a maximal error of 1 video frame  
167 duration (16.6 msec or 18 deg of phase at 3 Hz).

168 Electrodes were also monitored via the Bluetooth stimulator, which displayed real-time  
169 feedback on the impedance and waveforms of the stimulating current, so that the  
170 experimenter could visualize the functionality and impedance of all three electrodes and the  
171 output of the tACS stimulator that was connected to the electrodes.

172

### 173 **Experimental procedure**

174 The protocols were designed to assess rivalry before, during and after tACS, testing  
175 whether tACS is phase or frequency specific. We also included a control experiment to  
176 determine the stability of rivalry parameters over the duration of the active tACS experiments.  
177 This psychophysical control was used to determine whether there was any “drift” in the  
178 rivalry process after being exposed to the same stimulus for the duration of the experiment. In  
179 this control experiment, referred to below as the no-tACS control, the stimulus conditions and  
180 experiment duration were identical to the ones to be described for the first tACS experiment (3  
181 Hz anti-phase visual stimuli), but no electrical stimulation was applied at any time.

182 A pilot study was conducted to investigate whether orientation (45/135 deg), temporal  
183 frequency (3Hz/5Hz) or eye (left/right) biased overall rivalry distributions. We measured rivalry  
184 durations for each of the 8 pairwise combinations in 5 observers. By testing these various  
185 iterations of the same paradigm, we established that there was no effect of any of the three  
186 factors on overall rivalry modulation, allowing us to pick fixed pairings of eye and orientation  
187 and a fixed targeted eye.

188 In each experiment, an initial, non-stimulated block was presented to measure the  
189 participant’s baseline rate of rivalry. This first block lasted 4 minutes and was comprised of two  
190 trials, each lasting approximately two minutes. Next, blocks with 4 different tACS relative  
191 phases were run consecutively, but in random order for every subject to control for temporal  
192 order. Each block contained 4 trials, lasting approximately two minutes. For the duration of  
193 these blocks, participants received tACS stimulation at four different relative phases: 0°, 90°,

194 180°, or 270°. This portion of the experiment lasted 28 minutes. tACS stimulation was on for  
195 the entire 28-minute period. Immediately after the completion of the four blocks with tACS  
196 stimulation, participants completed a 6<sup>th</sup>, non-stimulated block of two trials, lasting 4  
197 minutes. Participants were then given a 10-minute break in which they could wash their hair  
198 but not leave the room. After the 10 minutes, participants completed condition 7, which also  
199 had no stimulation but featured the exact same stimulus. This was done in order to measure a  
200 possible persistent effect of tACS.

201 In the first tACS experiment (Experiment 2) and in the psychophysical control  
202 experiment, both Gabor patches flashed at 3Hz, but they were offset by 180° of one another.  
203 This made the sign of polarization opposite in the two eyes and was our test of phase  
204 specificity. During blocks 2-5, tACS was presented at 3Hz for the entire duration. When  
205 electrical stimulation was applied, tACS was synchronized with the 3Hz visual stimulus, such  
206 that it was at either 0°, 90°, 180°, or 270° offset in relation to the visual stimulus in the right  
207 eye.

208 In Experiment 3, the visual stimulus was presented at two different frequencies. This  
209 was our test of frequency specificity. The right eye's Gabor patch flashed at 3Hz, while the left  
210 eye's Gabor patch flashed at 5Hz. tACS was presented at 3Hz, targeting the right eye. During  
211 blocks 2-5, when tACS stimulation was applied, the tACS was synchronized with the 3Hz  
212 stimulus, such that it was at 0°, 90°, 180°, or 270° phase in relation to the visual stimulus. The  
213 relative phase of tACS with respect to the right eye precessed through all possible phase  
214 angles.

215

## 216 **Data Preprocessing**

217 The raw data was exported into MATLAB files for analysis. After exporting, data was  
218 then sorted into left and right presses. Next, duration lengths were calculated for each subject  
219 and each trial. The button hardware occasionally resulted in very short durations of non-press  
220 during periods of button press. These durations were cleaned up by consolidating any user  
221 non-press that lasted <0.5 seconds to the previous button press, provided it was the same  
222 button. Figure 2 shows raw button durations for three observers each with very different



223 duration distributions spanning the range observed in the experiment. To characterize these  
224 distributions, all data was transformed into log-seconds and then fitted utilizing a normal  
225 distribution. The log-normal fits were better than traditional gamma fits.

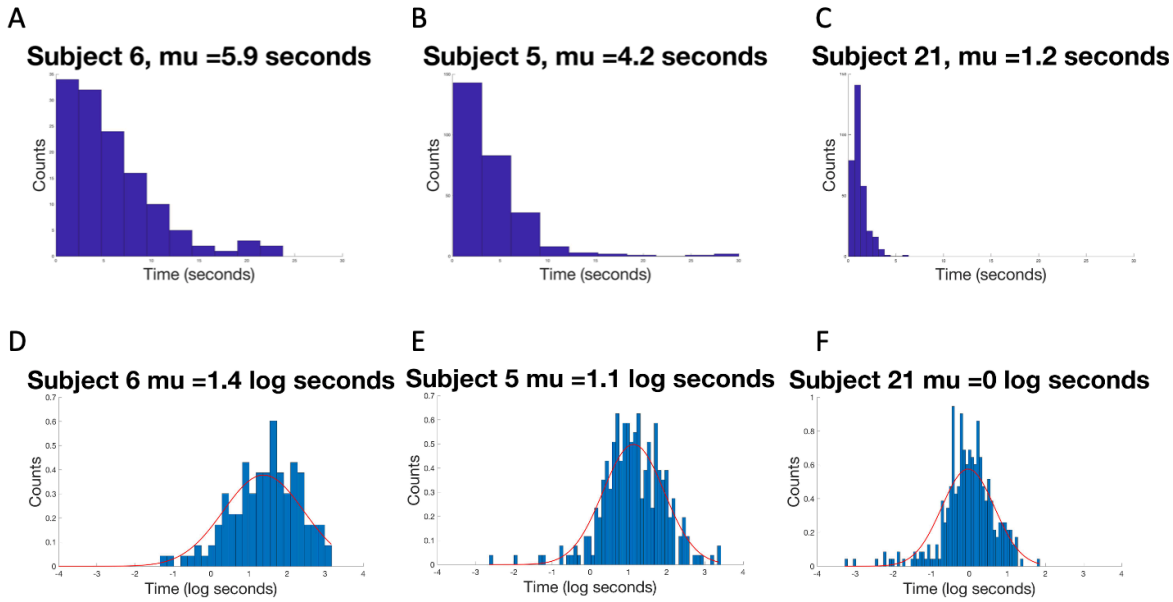

**Figure 2:** *Unprocessed and log-normalized data. A: Representative example of a participant with a longer mean rivalry duration. B: Representative example of a participant with an average mean rivalry duration. C: Representative example of a participant with a shorter mean rivalry duration. D-F: Log-transforms of the corresponding distributions A-C, demonstrating that the log-normal fit (red curve) accurately represents data for all rates of rivalry.*

226

## 227 **Outlier exclusion**

228 We noted that some participants had extremely long rivalry durations, suggesting that  
229 their rivalry process was far from being balanced. As this imbalance would likely reduce the  
230 sensitivity of the rivalry read-out to tACS perturbation, we developed an outlier screening  
231 procedure based on the raw durations. A 1.5IQR test was utilized to exclude outliers from each  
232 of the three experiments. For this exclusion, only means from condition 1 in each experiments  
233 were considered. This was done to ensure that we were excluding subjects who didn't have  
234 typical rivalry alternations in their baseline reading, not running the risk of excluding someone  
235 who might have been significantly affected by the electrical stimulation.

236  
237  
238

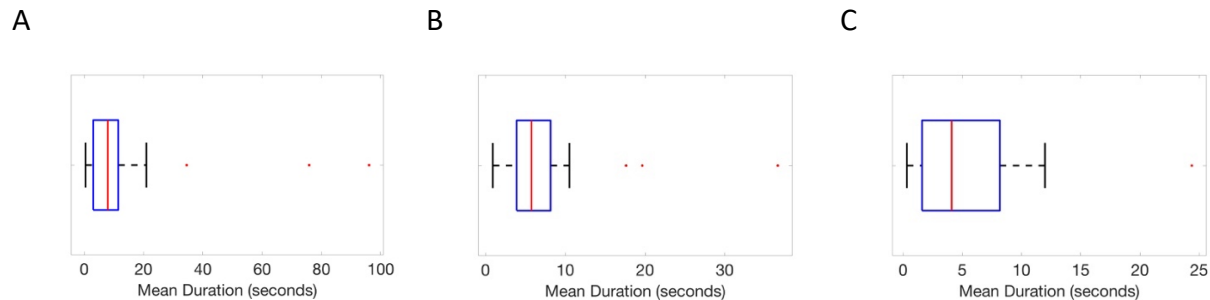

**Figure 3:** *Outlier detection. Detection of mean durations that fell outside of the pre-determined 1.5IQR of the data. A: Box and whisker plot for the 3Hz/5Hz visual stimulation Experiment. B: Box and whisker plot for the 3 Hz anti-phase visual stimuli setup. C: Box and whisker plot for the no-tACS control experiment. Outliers were data points that fell beyond  $1.5 \cdot IQR + Q3$  and are indicated by the red dots outside of the boxplot. These participants ( $n=3, 3$  and  $1$  for A, B and C, respectively) were excluded from further analysis, as they did not show typical rivalry alternations.*

239

## 240 **Data normalization**

241 As can be seen from Figure 2, the mean of each subject's log-durations varied  
242 significantly significant variation between the baseline mean durations. This variation arose  
243 because of the variable rate at which the subjects rived, with some rivaling faster than  
244 others. As the goal of the experiment is to assess the effects of tACS on perception within  
245 participants, we normalized all means to the participants value in the baseline condition by  
246 subtracting each condition's values from that of condition 1. Normalization was performed for  
247 both the log mean duration and switch-rate metrics. The effect of the normalization on  
248 duration measurements is shown in Figure 4 which plots the data from all conditions for the  
249 three observers shown in Figure 2. Panels A-C show the un-normalized log durations that have  
250 a larger range than after normalization (panels D-F).

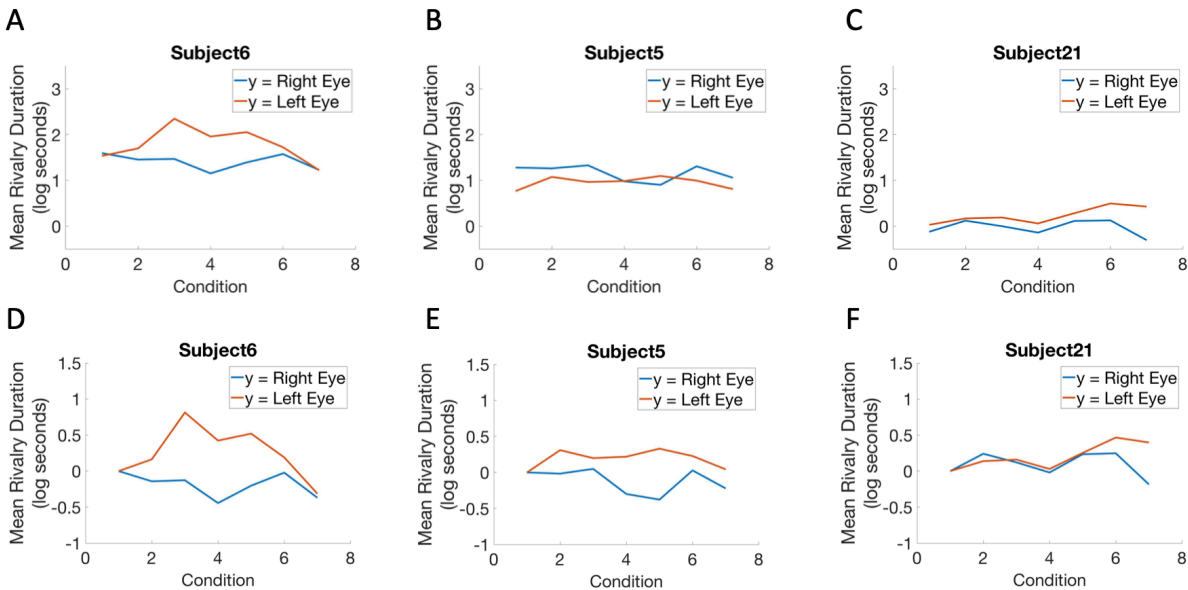

**Figure 4:** Normalizing duration data to a set baseline. A-C: Representative participants (same as those shown in Figure 2) showing the variability in the baseline and overall rivalry durations. D-F: Normalized participant data obtained by setting condition 1 as the subtracted baseline.

251

252 Once normalized, these data were averaged to generate graphs of mean normalized  
253 duration for right and left button presses and graphed over condition. For each condition, we  
254 also calculated the rivalry switch rate by counting how many times each subject switched  
255 buttons throughout the experiment and dividing that number by the duration of the  
256 experiment.

257

## 258 Statistical Analysis

259 To assess the impact of the phase of tACS on rivalry, paired t-tests were performed for  
260 all pair-wise combinations of the four test conditions, and then corrected utilizing the  
261 Bonferroni adjustment for multiple comparisons. If these tests revealed no significant  
262 differences, data from the four test conditions were pooled and tested against zero. This test  
263 determined the effectiveness of tACS at modulating rivalry in a phase-independent manner.

264 For the post-tACS conditions, paired t-tests compared condition 6 to condition 7  
265 (immediately post-tACS to 10 minutes post-tACS) to determine if there were any significant  
266 lasting effects of the stimulation. The two conditions were also t-tested against zero (the

267 baseline condition) to see if there was any overall effect of tACS. If the t-tests revealed that  
268 conditions 6 and 7 were statistically indistinguishable, the two conditions were pooled first and  
269 then compared to zero.

270

## 271 RESULTS

272

### 273 Behavioral control experiment without tACS

274 This experiment was performed to determine the degree to which rivalry features  
275 remain constant over the long duration of the tACS experiments. Drift in rivalry parameters  
276 over the duration of the experiment, if it occurred, would complicate the interpretation of the  
277 tACS data. Therefore, to test rivalry stability, we used the same number of trials and  
278 experiment duration as in the tACS experiments. The participants viewed 3 Hz anti-phase  
279 stimuli in each eye and reported which eye was dominant by holding down one button for left  
280 eye and a second button for right eye dominant periods.

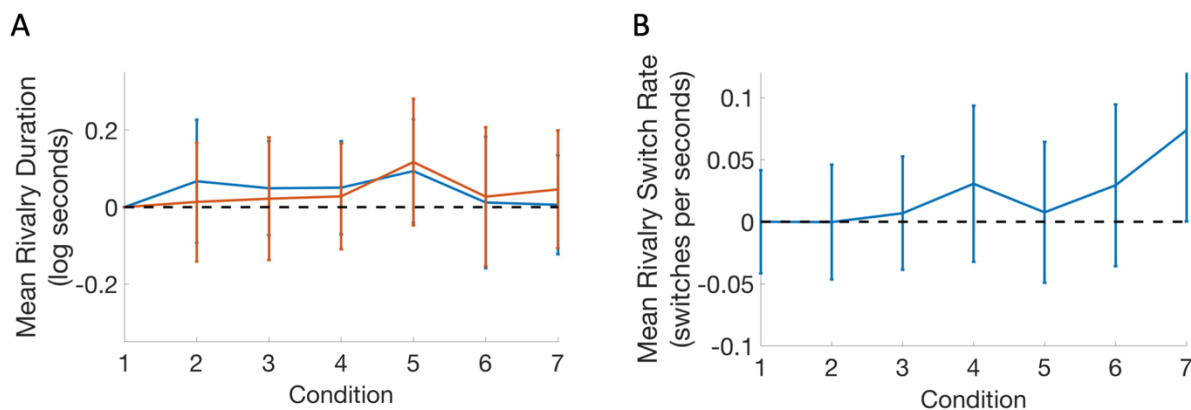

**Figure 5:** No tACS control experiment: 3 Hz right eye stimulation, 3Hz left eye stimulation without tACS stimulation. Panel A plots left- (red) and right-eye (blue) normalized mean durations. Panel B plots normalized mean rivalry switch rates over blocks of the experiment. Error bars plot +/- 1 s.e.m.

281 We observed no significant deviations from baseline durations or switch rates over the  
282 course of the experiment which lasted ~50 minutes. Note that conditions 2-5 were presented

283 in random over a period of 28 minutes, so to determine whether rivalry durations change over  
284 the period used in the active tACS phases of Experiments 2 and 3, we pooled the data across  
285 conditions 2-5 to obtain estimates of duration and switch rates at an average of 14 minutes  
286 after baseline. The immediate post-test (condition 6 data reflect rivalry at an average of 30  
287 minutes after baseline and the final post-test (condition 7), 42 minutes. In each case we tested  
288 the durations against the baseline value of zero. Each of the pooled condition 2-5 duration  
289 values were non-significant ( $p=0.33$ ; left eye,  $p=0.55$ . right eye). Similarly tests of the periods  
290 corresponding to the post-tACS conditions also revealed no significant changes in mean  
291 duration from baseline. For the immediate post-test the right eye  $p$ -value was 0.95 and the  
292 left eye value was 0.88. The corresponding values for the 10-minute post-tACS condition were  
293 0.96 and 0.77, respectively). For the switch rate parameter estimated at 14 minutes, there was  
294 no measurable deviation from baseline for either eye ( $p=0.83$ ), nor were there measurable  
295 changes in the immediate post-test ( $p=0.70$ ) or final post-test ( $p=0.39$ ).

296

### 297 **Phase-specificity of tACS**

298 The purpose of the next experiment was to determine whether tACS can modulate  
299 rivalry durations or switch rates in a phase-specific fashion. To make this measurement, we  
300 presented 3Hz visual stimulation to both eyes, but with 3Hz anti-phase tACS. Because we don't  
301 know the precise timing of the visual activity we are reading out, we presented tACS at 4  
302 different relative phases to span one full cycle of the visual and tACS stimulation (blocks 2-5). In  
303 each case tACS was in antiphase, given that the visual stimuli were always presented in anti-  
304 phase to the two eyes. The phase-specific hypothesis predicts that a tACS phase that is  
305 maximally suppressive in one eye will be maximally facilitative in the other eye which is  
306 receiving the opposite polarization, and vice versa, once the proper absolute delay between the  
307 visual system's internal response and the instantaneous tACS field is matched. We defined the  
308 relative phase of tACS with respect to the right eye's visual stimulation. If tACS was phase  
309 specific, we should see weakening in one eye accompanied with a strengthening in the other  
310 eye at a particular absolute phase value and the opposite effect at a phase value shifted by 180  
311 deg.

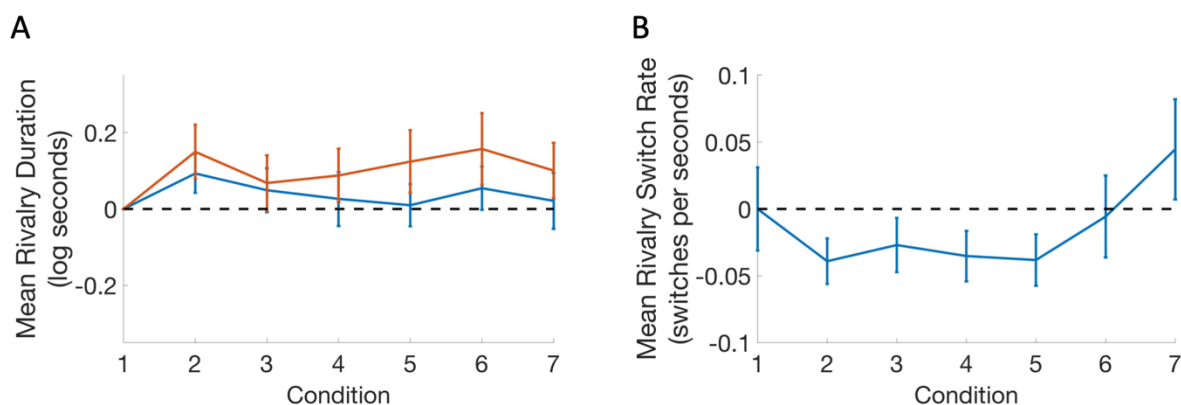

**Figure 6:** 3 Hz right eye stimulation, 3Hz left eye stimulation with 3Hz anti-phase tACS. Panel A plots left- (red) and right-eye (blue) mean durations B: Mean rivalry switch rate over blocks of the experiment. Error bars plot +/- 1 s.e.m.

312

313 The data for this experiment are presented in Figure 6, with left-eye data plotted in red  
314 and right-eye data plotted in blue for each block of the experiment. We first tested whether  
315 relative tACS/visual phase affected rivalry durations by performing all pair-wise comparisons  
316 between the four relative phase values (conditions 2-5 in Figure 6). We observed no phase-  
317 specific effect during the application of tACS. All Bonferroni adjusted p-values for the left and  
318 right eye pair-wise comparisons were 1.

319 While tACS did not modulate rivalry in a phase-dependent fashion, it could still exert an  
320 effect that is independent of relative phase. To test for this possibility, we pooled all of the  
321 mean duration measurements for each eye made during tACS stimulation and compared them  
322 to 0. The mean durations increased by a factor of 1.28 in the left eye compared to baseline and  
323 by a factor of 1.11 in the right eye. The shift for the left eye was highly significant ( $p= 0.004$ ) but  
324 was marginally significant for the right eye ( $p= 0.13$ ).

325 Another important parameter of the rivalry distribution is the rate of switches. Figure  
326 6B shows the rivalry switch rates. All pair-wise Bonferroni corrected tests over the tACS-present  
327 conditions had p-values = 1 and thus showed no phase specificity. By contrast, switch rates  
328 during tACS decreased by a factor of 1.22 ( $p< 0.000$ ).

329 We then asked whether any of the effects on mean duration and switch rate observed  
330 during tACS persisted immediately after cessation of tACS or after 10 minutes after tACS  
331 cessation. Mean durations for the immediate post-tACS condition were not significantly  
332 different from baseline for the right eye ( $p=0.35$ ), but there was a non-significant trend for  
333 longer durations in the left eye ( $p=0.11$ ). There were no measurable effects on mean duration  
334 for the 10-minute post-tACS condition (right eye 0.78, left eye 0.18). Switch rates in the  
335 immediate post-tACS condition were not measurably different from baseline ( $p=0.90$ ), nor were  
336 they different from baseline in the 10-minute post-tACS condition ( $p=0.36$ ).

337

### 338 Frequency Specificity of tACS

339 Having found no phase specificity of tACS stimulation, we moved on to test whether the  
340 tACS effects were frequency specific. This experiment visually stimulated the right eye at 3Hz  
341 and the left eye at 5Hz. We applied 3Hz tACS during the four middle “test” conditions and again  
342 varied tACS/visual phase. Thus, the right eye received synchronous 3 Hz tACS stimulation at  
343 different relative phases, but the left eye received asynchronous tACS/visual stimulation as the  
344 visual stimulus was presented at 5 Hz. If tACS’ effects were frequency specific, the effects of  
345 tACS should be most apparent in the synchronously stimulated right eye.

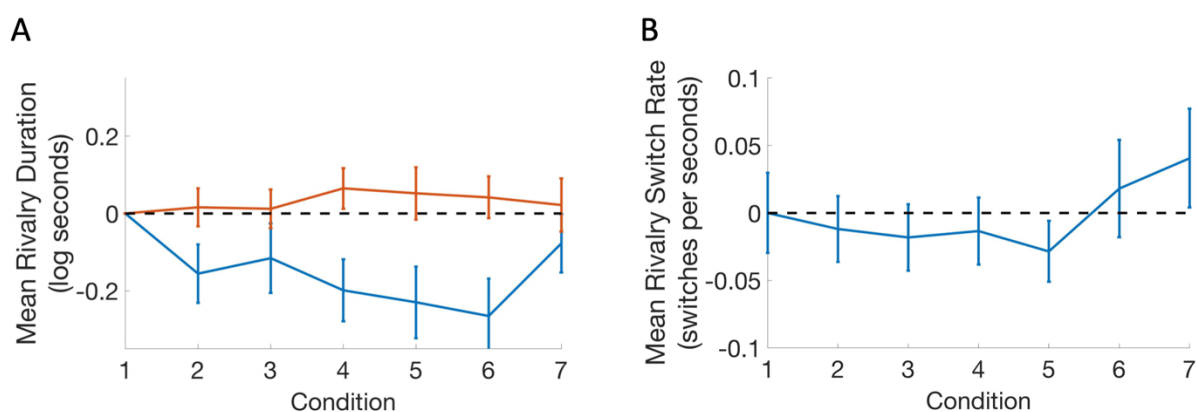

**Figure 7:** 3 Hz right eye visual stimulation, 5Hz left eye visual stimulation. 3Hz tACS reveals a slowing of percept durations in targeted eye and no change in nontargeted eye.

Panel A shows rivalry durations for both left (orange) and right (blue, targeted) eyes. Panel B shows rivalry switch rates. Rivalry slows in the targeted eye, and switch rates decrease.

346

347           The data from this experiment are shown in Figure 7. As in Experiment 2, we observed  
348 no phase-specific effects on mean rivalry duration during the application of tACS. All pair-wise,  
349 Bonferroni-corrected p-values were 1 for both eyes. We thus pooled all of the mean duration  
350 measurements for each eye made during tACS stimulation and compared them to 0 to detect  
351 any significant modulation from baseline in the two eyes' percepts. The mean durations  
352 increased by a factor of 1.08 in the left eye and *decreased* by a factor of 1.50 in the right eye.  
353 The shift for the right eye was highly significant ( $p < 0.000$ ) but was marginally significant for the  
354 left eye ( $p = 0.19$ ). Figure 7B shows the rivalry switch rates. The switch rates did not differ by  
355 phase on pair-wise Bonferroni corrected tests (all p-values = 1), but they decreased overall by a  
356 factor of 1.28 ( $p < 0.000$ ). The fact that the two eye durations change in opposite directions in  
357 this experiment, versus changing in the same direction as 3 Hz anti-phase experiment, plus the  
358 fact that switch rates decrease suggests tACS is effective and is frequency specific.

359           We then asked whether any of the effects on mean duration and switch rate observed  
360 during tACS persisted immediately after cessation of tACS or after 10 minutes post tACS. Mean  
361 durations for the immediate post-tACS condition were significantly different from baseline for  
362 the right eye ( $p = 0.01$ ) but were not significantly different from baseline for longer durations in  
363 the left eye ( $p = 0.44$ ). There were no measurable effects on mean duration for the 10 minute  
364 post-tACS condition (right eye 0.32, left eye 0.75). Switch rates in the immediate post-tACS  
365 condition were not measurably different from baseline ( $p = 0.78$ ), nor were they different from  
366 baseline in the 10-minute post-tACS condition ( $p = 0.45$ ).

367

## 368 **DISCUSSION**

369           Our results using bi-stable rivalry percepts as a readout suggest that the effects  
370 of tACS on visual perception depend on matching the frequency of visual and tACS stimulation,  
371 but not on the relative phase of matched-frequency stimulation. The lack of phase specificity  
372 was found in both the 3 Hz anti-phase and 3Hz/5Hz experiments. When 3Hz/5Hz frequencies of  
373 visual stimulation were used, tACS that matched the visual stimulation rate (3Hz) decreased the  
374 mean durations in that eye, and there was a marginally significant increase in duration in the



375 other (5Hz). By contrast, when anti-phase tACS of the same frequency (3Hz) was presented to  
376 each eye, both eyes durations increased. Together, these results indicate that the effect  
377 of tACS was frequency, but not phase specific. Levelt's laws of rivalry allow us to deduce that  
378 that tACS acted to reduce internal response strength, as described in the next section.

379 Our findings are largely interpretable within the framework of Levelt's laws governing  
380 rivalry as recently updated by Brascamp and co-workers (LeVeldt, 1965; Brascamp et al.,  
381 2015). Levelt's original laws were based on the results of psychophysical studies of rivalry  
382 including situations that varied the relative stimulus intensities in the two eyes. Here, we  
383 consider whether tACS effectively modulates internal response strength in a way similar to  
384 changes stimulus intensity. There are four Levelt's laws and we interpret our data with respect  
385 to each of them in the order that they have been traditionally stated. Levelt's first law states  
386 that increasing the stimulus strength in one eye increases the perceptual dominance of that  
387 eye's stimulus, and conversely, decreasing the stimulus strength in one eye decreases its  
388 perceptual dominance. Here we do not manipulate visual stimulus strength, but we sought to  
389 manipulate the strength of the internal neural response via tACS. In our test of frequency-  
390 specificity with 3Hz/5Hz stimulation, we observed a phase-independent decrease in the right  
391 eye's perceptual dominance reflected by its shorter mean durations consistent with this eye's  
392 internal representation being weakened. Weakening of the representation in traditional rivalry  
393 experiments would come about by decreasing stimulus intensity, so we interpret the effect of  
394 tACS in this experiment as being effectively suppressive.

395 Levelt's second law states that "increasing the difference in stimulus strength between  
396 the two eyes will primarily act to increase the average perceptual dominance duration of the  
397 eye with the stronger stimulus." In the 3Hz/5Hz experiment, tACS targeted the right eye, acting  
398 to shorten its durations, consistent with its response being weakened based on the above  
399 prediction from the first law. According to the second law, this should have the effect of  
400 increasing the mean duration of the opposite eye. We see a trend in this direction, but the  
401 effect is larger on the targeted eye. While the original second law stipulated that this increase  
402 in the non-targeted eye should have been larger than the effect on the (weakened) targeted  
403 right eye, more recent findings have shown that the second law is only valid for a relatively

404 restricted range of stimulus intensities and thus internal response intensities, as studied here  
405 and can even reverse sign (Brascamp et al., 2006). Second law predictions are thus not strongly  
406 proscriptive in the present context.

407 Levelt's revised third law states that "increasing the difference in stimulus strength  
408 between the two eyes will reduce the perceptual alternation rate" (Brascamp et al., 2015). The  
409 data from 3Hz/Hz experiment are relevant here and we indeed see a reduction in the  
410 perceptual alternation rate from baseline when the two eyes are stimulated asymmetrically,  
411 *e.g.* only the right eye received synchronous tACS stimulation. Related to this, bistable percept  
412 alternation rates have been shown to be maximal when competing percepts are perceptually  
413 balanced, as they would have been at baseline (Moreno-Bote et al., 2010). A modulatory effect  
414 of tACS (in either direction) is thus predicted to lower the alternation rate, which is what we  
415 observe.

416 Levelt's fourth law states that "increasing stimulus strength in both eyes while keeping it  
417 equal between eyes will generally increase the perceptual alternation rate..." (Brascamp et al.,  
418 2015). The converse is true and more relevant to our observations. Switch rates decrease in  
419 the 3Hz/3Hz condition, suggesting that internal response strength decreased, which is  
420 consistent with mean durations having also decreased, as suggested above for the first law  
421 interpretation of the mean duration data of the 3Hz/5Hz experiment which used asymmetric  
422 stimulation.

423

#### 424 **Possible mechanisms underlying observed tACS effects**

425 Prior work in animal models has suggested that tACS can exert phase-specific effects via  
426 interactions between the imposed field and cell membrane potentials (Deans et al., 2007;  
427 Frohlich and McCormick, 2010; Reato et al., 2010, 2013). Two non-invasive studies in human  
428 have varied the relative phase of synchronous tACS and periodic sensory stimuli. The first study  
429 (Neuling et al., 2012) reported that psychophysical thresholds for detecting brief 500 Hz tones  
430 in noise depended on the timing of the tones relative to 10 Hz tACS. This effect was  
431 subsequently replicated with 4 Hz tACS (Riecke et al., 2015). A similar approach has not been  
432 taken in the visual modality, to our knowledge. In the visual modality, Ruhнау and co-workers

433 (Ruhnau et al., 2016), presented visual flicker at 7 and 11 Hz in presence of frequency-matched  
434 or non- matching tACS. They found tACS effects to be frequency-specific, as we report here.  
435 They could not assess phase-specificity as their visual and electrical stimuli were not phase-  
436 synchronized as they were in the present experiments.

437         The relative lack of phase-specificity in our experiment relative to that reported  
438 previously with auditory stimuli could arise for a number of different reasons. First, the  
439 effective current strength delivered to cortex could differ for auditory vs visual stimulation  
440 montages. The auditory experiments used a bipolar montage with electrodes over auditory  
441 cortex where the skull is much thinner than it is over the occipital pole where our 3-electrode  
442 array was located. Instantaneous, phase-specific modulation effects are expected to depend  
443 strongly on delivered field strength and recent estimates have suggested that the deposited  
444 field in human transcranial stimulation experiments is weak relative to that needed to influence  
445 membrane potential (Opitz et al., 2016; Huang et al., 2017; Voroslakos et al., 2018). Secondly,  
446 the rivalry stimuli were highly supra-threshold, rather than being near threshold as in the  
447 auditory detection experiments. tACS effects may depend on the strength of the internal  
448 response, which is very small for near threshold stimuli and larger for supra-threshold stimuli.  
449 Network-level activity may thus have differed substantially. Finally, the effect of tACS not only  
450 depends on electrical path length between the electrodes and the active tissue, but it also  
451 depends on tissue orientation (Opitz et al., 2011). We attempted to minimize this effect by  
452 using small visual stimuli that will produce relatively small patches of cortical activation.  
453 Because there are multiple representations of the visual field, the separate representations of  
454 the patches in different visual areas may have sufficiently different orientation to eliminate the  
455 effect of tACS phase which could invert depending on tissue orientation.

456         Transcranial Electrical Stimulation can also act via non-instantaneously through  
457 mechanisms that modulate synaptic efficacy (Zaehle et al., 2010; Jackson et al., 2016; Kronberg  
458 et al., 2017). These effects are necessary to explain the offline effect we have observed, as  
459 there is no imposed field present to interact with cell membrane potentials in the offline  
460 conditions. Recall that we showed an immediate offline effect on targeted-eye rivalry duration  
461 in the 3Hz/5 Hz condition. It is possible that these mechanisms also underlie the effects we

462 observe during tACS stimulation. Consistent with this, the sign of the offline effect is the same  
463 as the effect during tACS stimulation.

464 In conclusion, tACS stimulation can modulate visual perception and under our  
465 conditions its net effect is consistent with a weakening of the internal visually-driven signal.

466

467

468

469

470

## REFERENCES

471 Antal A, Paulus W (2013) Transcranial alternating current stimulation (tACS). *Front Hum*  
472 *Neurosci* 7:317.

473 Brascamp JW, Klink PC, Levelt WJ (2015) The 'laws' of binocular rivalry: 50 years of Levelt's  
474 propositions. *Vision Res* 109:20-37.

475 Brascamp JW, van Ee R, Noest AJ, Jacobs RH, van den Berg AV (2006) The time course of  
476 binocular rivalry reveals a fundamental role of noise. *J Vis* 6:1244-1256.

477 Deans JK, Powell AD, Jefferys JG (2007) Sensitivity of coherent oscillations in rat hippocampus  
478 to AC electric fields. *J Physiol* 583:555-565.

479 Dougherty RF, Koch VM, Brewer AA, Fischer B, Modersitzki J, Wandell BA (2003) Visual field  
480 representations and locations of visual areas V1/2/3 in human visual cortex. *J Vis* 3:586-  
481 598.

482 Frohlich F, McCormick DA (2010) Endogenous electric fields may guide neocortical network  
483 activity. *Neuron* 67:129-143.

484 Helfrich RF, Schneider TR, Rach S, Trautmann-Lengsfeld SA, Engel AK, Herrmann CS (2014)  
485 Entrainment of brain oscillations by transcranial alternating current stimulation. *Curr*  
486 *Biol* 24:333-339.

487 Huang Y, Liu AA, Lafon B, Friedman D, Dayan M, Wang X, Bikson M, Doyle WK, Devinsky O,  
488 Parra LC (2017) Measurements and models of electric fields in the in vivo human brain  
489 during transcranial electric stimulation. *Elife* 6.

490 Jackson MP, Rahman A, Lafon B, Kronberg G, Ling D, Parra LC, Bikson M (2016) Animal models  
491 of transcranial direct current stimulation: Methods and mechanisms. *Clin Neurophysiol*  
492 127:3425-3454.

- 493 Kar K, Krekelberg B (2012) Transcranial electrical stimulation over visual cortex evokes  
494 phosphenes with a retinal origin. *J Neurophysiol* 108:2173-2178.
- 495 Kronberg G, Bridi M, Abel T, Bikson M, Parra LC (2017) Direct Current Stimulation Modulates  
496 LTP and LTD: Activity Dependence and Dendritic Effects. *Brain Stimul* 10:51-58.
- 497 LeVeldt WJM (1965) On binocular rivalry. The Netherlands: Institute for Perception RVO-TNO.
- 498 Liu A, Voroslakos M, Kronberg G, Henin S, Krause MR, Huang Y, Opitz A, Mehta A, Pack CC,  
499 Krekelberg B, Berenyi A, Parra LC, Melloni L, Devinsky O, Buzsaki G (2018) Immediate  
500 neurophysiological effects of transcranial electrical stimulation. *Nat Commun* 9:5092.
- 501 Moreno-Bote R, Shpiro A, Rinzel J, Rubin N (2010) Alternation rate in perceptual bistability is  
502 maximal at and symmetric around equi-dominance. *J Vis* 10:1.
- 503 Neuling T, Rach S, Wagner S, Wolters CH, Herrmann CS (2012) Good vibrations: oscillatory  
504 phase shapes perception. *Neuroimage* 63:771-778.
- 505 Opitz A, Windhoff M, Heidemann RM, Turner R, Thielscher A (2011) How the brain tissue  
506 shapes the electric field induced by transcranial magnetic stimulation. *Neuroimage*  
507 58:849-859.
- 508 Opitz A, Falchier A, Yan CG, Yeagle EM, Linn GS, Megevand P, Thielscher A, Deborah AR, Milham  
509 MP, Mehta AD, Schroeder CE (2016) Spatiotemporal structure of intracranial electric  
510 fields induced by transcranial electric stimulation in humans and nonhuman primates.  
511 *Sci Rep* 6:31236.
- 512 Ozen S, Sirota A, Belluscio MA, Anastassiou CA, Stark E, Koch C, Buzsaki G (2010) Transcranial  
513 electric stimulation entrains cortical neuronal populations in rats. *J Neurosci* 30:11476-  
514 11485.

- 515 Reato D, Rahman A, Bikson M, Parra LC (2010) Low-intensity electrical stimulation affects  
516 network dynamics by modulating population rate and spike timing. *J Neurosci* 30:15067-  
517 15079.
- 518 Reato D, Rahman A, Bikson M, Parra LC (2013) Effects of weak transcranial alternating current  
519 stimulation on brain activity-a review of known mechanisms from animal studies. *Front*  
520 *Hum Neurosci* 7:687.
- 521 Riecke L, Formisano E, Herrmann CS, Sack AT (2015) 4-Hz Transcranial Alternating Current  
522 Stimulation Phase Modulates Hearing. *Brain Stimul* 8:777-783.
- 523 Ruhнау P, Keitel C, Lithari C, Weisz N, Neuling T (2016) Flicker-Driven Responses in Visual  
524 Cortex Change during Matched-Frequency Transcranial Alternating Current Stimulation.  
525 *Front Hum Neurosci* 10:184.
- 526 Stagg CJ, Nitsche MA (2011) Physiological basis of transcranial direct current stimulation.  
527 *Neuroscientist* 17:37-53.
- 528 Stagg CJ, Antal A, Nitsche MA (2018) Physiology of Transcranial Direct Current Stimulation. *J ECT*  
529 34:144-152.
- 530 Voroslakos M, Takeuchi Y, Brinyiczki K, Zombori T, Oliva A, Fernandez-Ruiz A, Kozak G, Kincses  
531 ZT, Ivanyi B, Buzsaki G, Berenyi A (2018) Direct effects of transcranial electric stimulation  
532 on brain circuits in rats and humans. *Nat Commun* 9:483.
- 533 Zaehle T, Rach S, Herrmann CS (2010) Transcranial alternating current stimulation enhances  
534 individual alpha activity in human EEG. *PLoS One* 5:e13766.  
535
